# Supplementary material for: Prenatal parental depression and preterm birth: a national cohort study
Source: PubMed Central journal article supplement — BJOG. 2016 Jan 19;123(12):1973–82. doi: 10.1111/1471-0528.13891 (PMC5096244; doi:10.1111/1471-0528.13891), 2016-01-19
Supplement: BJO-123-1973-s001.pdf [file BJO-123-1973-s001.pdf]

Table S1.

|                            | Very preterm             |                                | Moderately preterm       |                                  |
|----------------------------|--------------------------|--------------------------------|--------------------------|----------------------------------|
|                            | Spontaneous<br>(n=1 061) | Medically indicated<br>(n=695) | Spontaneous<br>(n=9 828) | Medically indicated<br>(n=3 466) |
|                            | OR 95% CI                | OR 95% CI                      | OR 95% CI                | OR 95% CI                        |
|                            | Model 3                  | Model 3                        | Model 3                  | Model 3                          |
| <b>Paternal depression</b> |                          |                                |                          |                                  |
| No depression              | 1.00                     | 1.00                           | 1.00                     | 1.00                             |
| New depression             | 1.04 (0.68-1.57)         | <b>1.67</b> (1.07-2.61)        | 1.09 (0.94-1.25)         | 1.24 (0.98-1.57)                 |
| Recurrent depression       | 1.28 (0.88-1.86)         | 1.06 (0.61-1.85)               | 1.08 (0.94-1.23)         | 1.04 (0.81-1.34)                 |
| <b>Maternal depression</b> |                          |                                |                          |                                  |
| No depression              | 1.00                     | 1.00                           | 1.00                     | 1.00                             |
| New depression             | 1.28 (0.94-1.74)         | 1.17 (0.76-1.79)               | <b>1.20</b> (1.07-1.33)  | <b>1.71</b> (1.45-2.03)          |
| Recurrent depression       | 1.03 (0.77-1.39)         | 1.13 (0.80-1.61)               | <b>1.38</b> (1.27-1.51)  | <b>1.38</b> (1.18-1.61)          |

Model 3 adjusted for variables in Model 2 and for the pregnancy complications and outcome, i.e. preeclampsia, SGA, placental abruption, gestational diabetes, and sex of child.

Note: Model 3 is based on 341 827 observations with complete information on covariates.

Table S2. Paternal and maternal depression and risks of very ( $\leq 31$  weeks) and moderately (32-36 weeks) preterm birth among those mothers living with the father (N= 340 951).

| <b><i>Mother living with the father (N= 340 951)</i></b>   |                                              |                         |                         |                                                |                         |                         |
|------------------------------------------------------------|----------------------------------------------|-------------------------|-------------------------|------------------------------------------------|-------------------------|-------------------------|
|                                                            | Very preterm ( $\leq 31$ weeks)<br>(n=1 779) |                         |                         | Moderately preterm (32-36 weeks)<br>(n=13 308) |                         |                         |
|                                                            | N (%)                                        | OR 95% CI               |                         | N (%)                                          | OR 95% CI               |                         |
|                                                            |                                              | Model 1                 | Model 2                 |                                                | Model 1                 | Model 2                 |
| <b>Paternal depression</b>                                 |                                              |                         |                         |                                                |                         |                         |
| No depression                                              | 1 685(0.5)                                   | 1.00                    | 1.00                    | 12 734(3.9)                                    | 1.00                    | 1.00                    |
| New depression                                             | 51(0.8)                                      | <b>1.56</b> (1.18-2.06) | <b>1.47</b> (1.09-1.98) | 281(4.6)                                       | <b>1.15</b> (1.02-1.30) | 1.09 (0.96-1.24)        |
| Recurrent depression                                       | 43(0.6)                                      | 1.22 (0.89-1.67)        | 1.17 (0.85-1.61)        | 293(4.3)                                       | 1.10 (0.97-1.23)        | 1.06 (0.94-1.20)        |
| <b>Maternal depression</b>                                 |                                              |                         |                         |                                                |                         |                         |
| No depression                                              | 1 621(0.5)                                   | 1.00                    | 1.00                    | 12 052(3.8)                                    | 1.00                    | 1.00                    |
| New depression                                             | 76(0.8)                                      | <b>1.51</b> (1.20-1.90) | 1.28 (1.00-1.65)        | 491(5.1)                                       | <b>1.32</b> (1.21-1.45) | <b>1.31</b> (1.19-1.44) |
| Recurrent depression                                       | 82(0.6)                                      | 1.17 (0.94-1.46)        | 1.09 (0.87-1.37)        | 765(5.7)                                       | <b>1.48</b> (1.37-1.60) | <b>1.43</b> (1.32-1.55) |
| <b><i>Mother not living with the father (N=14 147)</i></b> |                                              |                         |                         |                                                |                         |                         |
|                                                            | Very preterm ( $\leq 31$ weeks)<br>(n=107)   |                         |                         | Moderately preterm (32-36 weeks)<br>(n=682)    |                         |                         |
|                                                            | N (%)                                        | OR 95% CI               |                         | N (%)                                          | OR 95% CI               |                         |
|                                                            |                                              | Model 1                 | Model 2                 |                                                | Model 1                 | Model 2                 |
| <b>Paternal depression</b>                                 |                                              |                         |                         |                                                |                         |                         |
| No depression                                              | 97(0.8)                                      | 1.00                    | 1.00                    | 612(4.7)                                       | 1.00                    | 1.00                    |
| New depression                                             | 5(0.7)                                       | 0.95 (0.39-2.35)        | 0.77 (0.29-2.07)        | 43(6.4)                                        | 1.36 (0.99-1.88)        | 1.40 (1.00-1.95)        |
| <b>Maternal depression</b>                                 |                                              |                         |                         |                                                |                         |                         |
| No depression                                              | 84(0.7)                                      | 1.00                    | 1.00                    | 520(4.5)                                       | 1.00                    | 1.00                    |
| New depression                                             | 11(0.9)                                      | 1.23 (0.66-2.30)        | 0.84 (0.40-1.78)        | 82(6.8)                                        | <b>1.54</b> (1.21-1.96) | <b>1.54</b> (1.20-1.99) |
| Recurrent depression                                       | 12(0.9)                                      | 1.25 (0.68-2.30)        | 1.25 (0.67-2.33)        | 80(5.9)                                        | <b>1.35</b> (1.06-1.73) | 1.28 (0.99-1.66)        |

Model 1: adjusted for calendar year of birth, maternal age, parity, paternal education and paternal age ( $\geq 45$ ).

Model 2: adjusted for variables in Model 1, smoking, BMI, and also chronological order of parental depression.

Note: Parental depressions were measured in 12 months before conception until 24 gestational weeks.

*In the population of mother living with father:*

Model 1 is based on 340 951 observations with complete information on covariates.

Model 2 is based on 327 300 observations with complete information on covariates

*In the population of mother not living with father:*

Model 1 is based on 14 147 observations with complete information on covariates.

Model 2 is based on 13 111 observations with complete information on covariates
